# Supplementary material
Source: MDPI journal article supplement (https://www.mdpi.com/2313-0105/9/2/87)
Supplement: s1 [file s1]

# Limiting factors affecting the ionic conductivities of LATP/polymer hybrid electrolytes

**Adrien Méry<sup>1</sup>, Steeve Rousselot<sup>1</sup>, David Lepage<sup>1</sup>, David Aymé-Perrot<sup>2</sup>, Mickaël Dollé<sup>1\*</sup>**

<sup>1</sup>Département de Chimie, Université de Montréal, 1375 Avenue Thérèse-Lavoie-Roux, Montréal, Québec H2V 0B3, Canada

<sup>2</sup>TotalEnergies SE, 2 Pl. Jean Millier, La Défense 6, 92078, Paris (France)

## Supporting Information

**Figure S1. SEM pictures of the LATP powder used throughout the study**

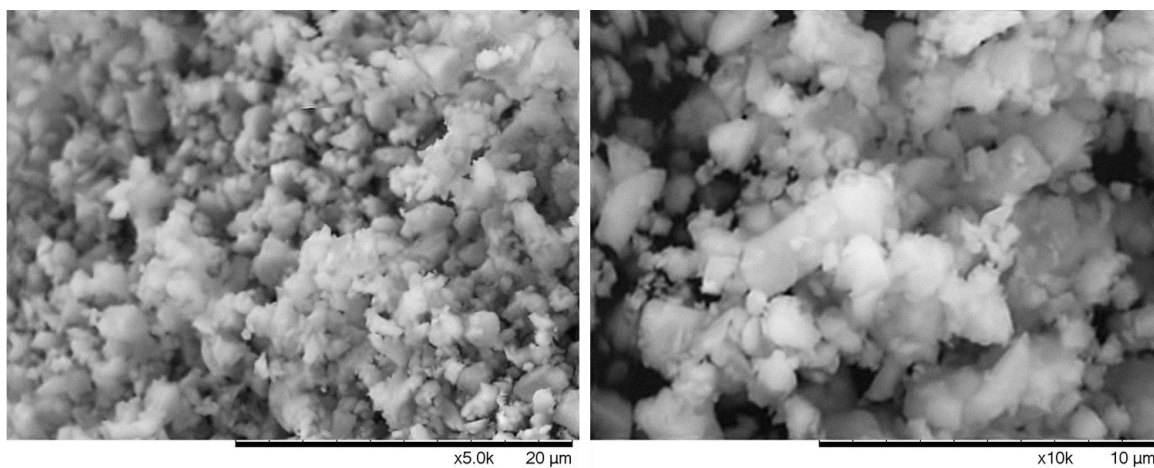

Figure S2. XRD pattern of the LATP powder synthesized for this study and corresponding pellet after SPS sintering at 850°C for this study

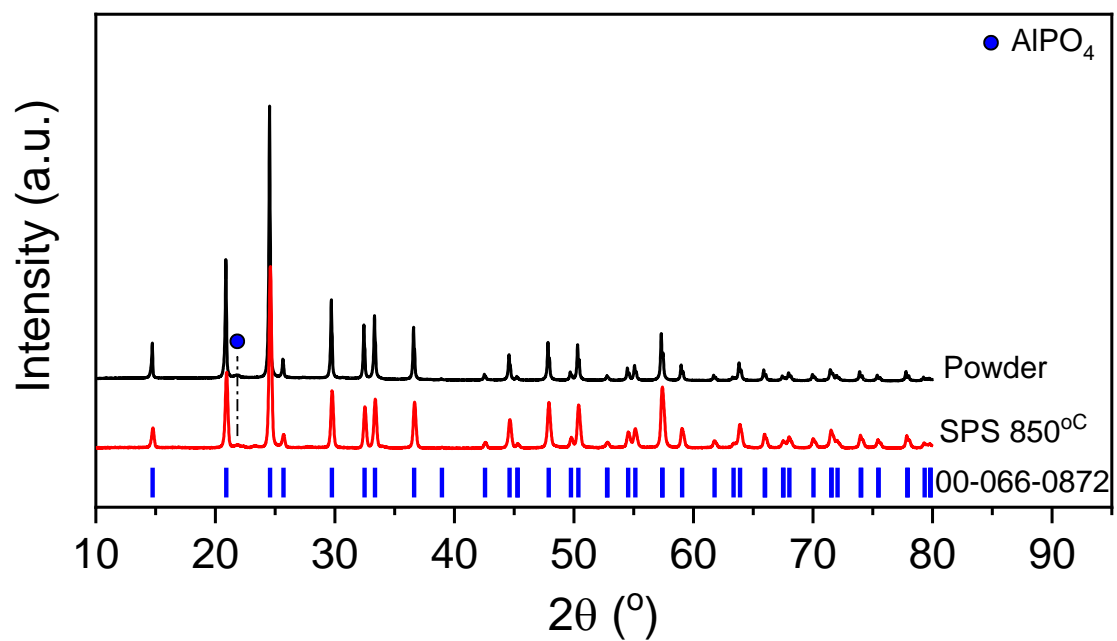

**Figure S3.** SEM picture of the cross section of the LATP SPS pellet sintered at 850°C.

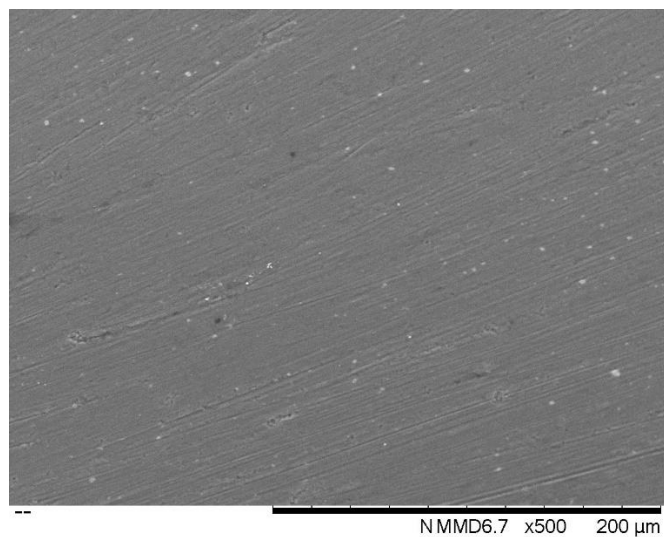

Figure S4. EIS Diagram at room temperature of the LATP pellet produced by SPS at 850°C

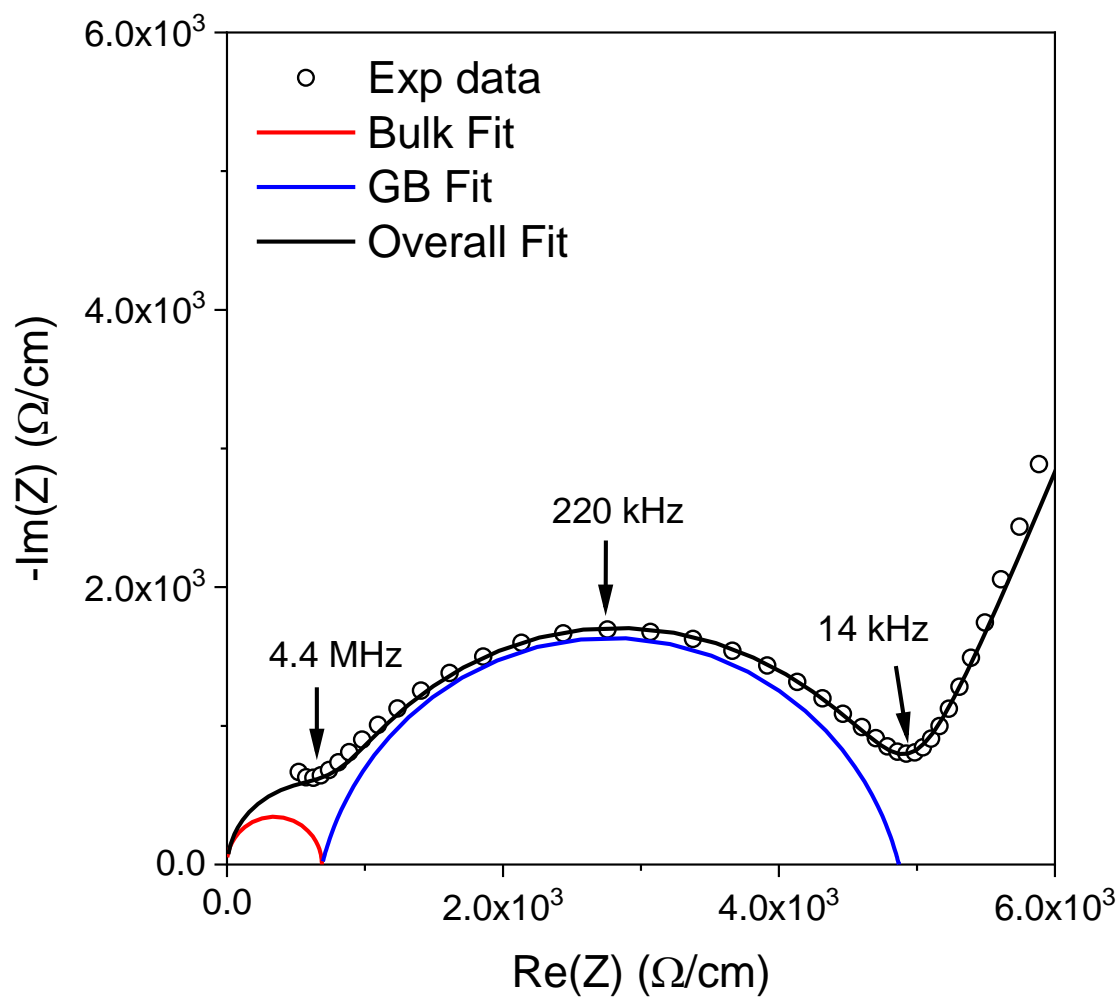

Figure S5. EIS Diagram of LATP pellets produced by SPS and NS at 850°C and 500°C

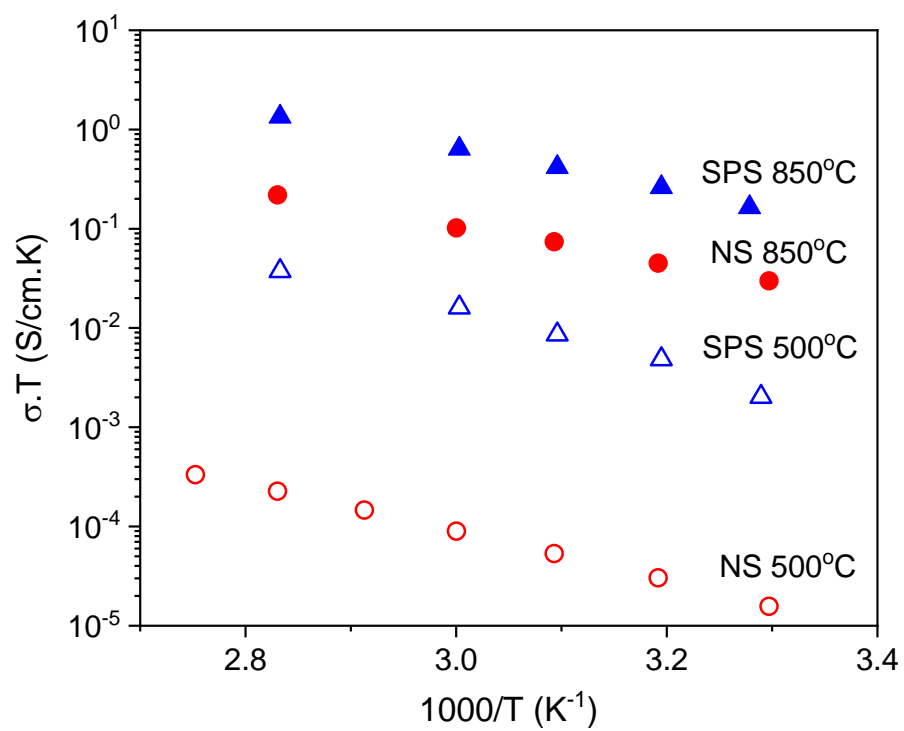

**Figure S6.** SEM picture of the cross section of the LATP NS pellet prepared at 500°C.

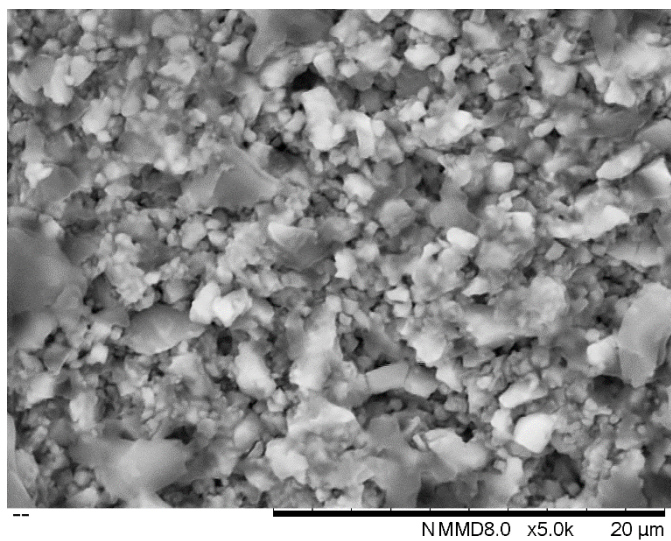

**Figure S7. EIS diagrams at 20 MPa upon decrease of applied pressure for LATP at 70°C for compact powder (a) and pellet produced by SPS at 850°C (b)**

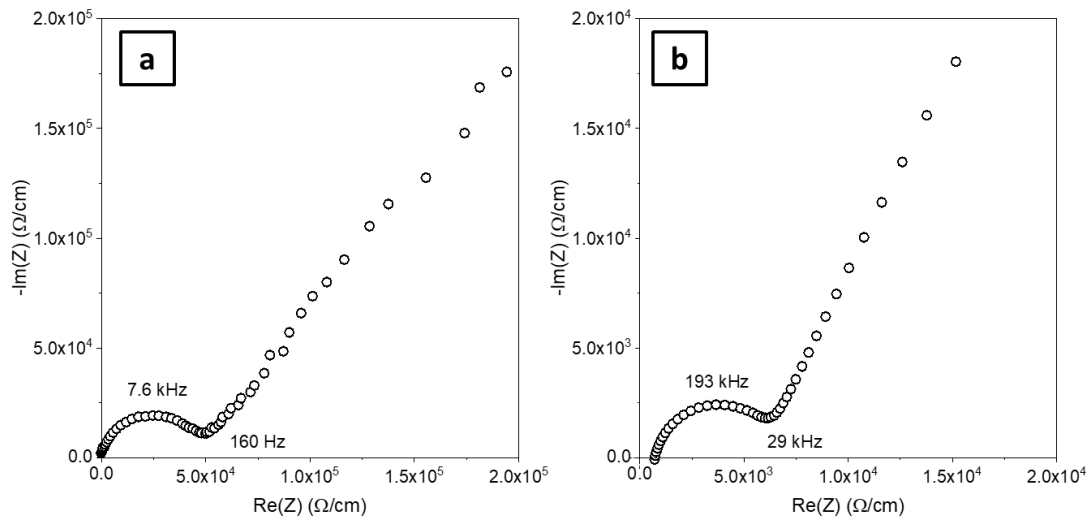

**Figure S8. EIS diagrams at RT at 20 MPa upon decrease of applied pressure for PEO-LATP75 without LITFSI Salt**

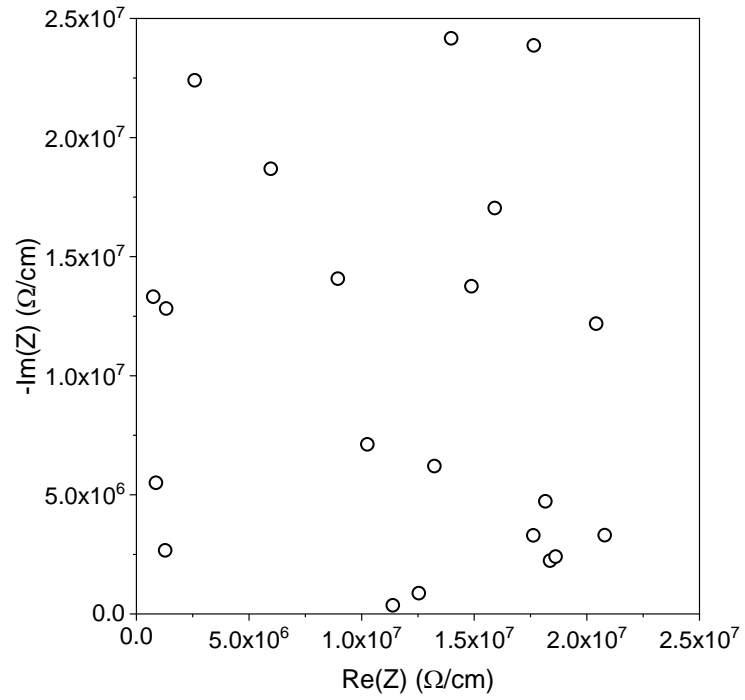

\* Noisy and impracticable data are resulting of the limitation of the potentiostat which represents an ionic conductivity lower then  $10^{-11} \text{ S/cm}$  in our configuration.
